# Supplementary material for: LiSep LSTM: A Machine Learning Algorithm for Early Detection of Septic Shock
Source: PubMed Central journal article supplement (PMC6805937; doi:10.1038/s41598-019-51219-4), 2019-10-22
Supplement: 41598_2019_51219_MOESM1_ESM.pdf [file 41598_2019_51219_MOESM1_ESM.pdf]

# LiSep LSTM: A Machine Learning Algorithm for Early Detection of Septic Shock - Supplementary Materials

Fagerström, Josef,<sup>1,\*</sup> Bång, Magnus<sup>1,+</sup>, Wilhelms, Daniel<sup>2,3,+</sup> Chew, Michelle<sup>2,+</sup>

<sup>1</sup>Department of Computer and Information Science, Linköping University, Linköping, 581 83, Sweden

<sup>2</sup>Division of Drug Research, Department of Medical and Health Sciences, Faculty of Health Sciences, Linköping University, Linköping 581 83, Sweden

<sup>3</sup>Department of Emergency Medicine, Local Health Care Services in Central Östergötland, Region Östergötland, Linköping, 581 91, Sweden

\*josef.fagerstrom@liu.se

+shared senior authorship

| <b>Statistic</b>                       | <b>Amount</b> | <b>%</b>    |
|----------------------------------------|---------------|-------------|
| Number of admissions                   | 50373         | 100         |
| Male patients                          | 28304         | 56.2        |
| Female patients                        | 22069         | 43.8        |
| Patients with sepsis                   | 11224         | 22.3        |
| Patients with severe sepsis            | 10115         | 20.1        |
| Patients with septic shock             | 4786          | 9.50        |
| Total IHD                              | 5783          | 11.5        |
| Sepsis IHD                             | 2153          | 4.27 (19.2) |
| Severe sepsis IHD                      | 2116          | 4.20 (20.9) |
| Septic shock IHD                       | 1556          | 3.09 (32.5) |
| Unspecified 28-day mortality           | 1883          | 3.74        |
| Sepsis 28-day mortality                | 715           | 1.42 (6.37) |
| Severe sepsis 28-day mortality         | 644           | 1.28 (6.37) |
| Septic shock 28-day mortality          | 302           | 0.60 (6.31) |
| Mechanical ventilation during ICU stay | 14143         | 28.1        |

Supplementary Table 1: Population overview

IHD = In-hospital deaths. Number of patients who died in the hospital while exhibiting symptoms for the specified condition. Note that the specified condition is not necessarily the cause of death.

When two percentages are presented, the first one is relative to the total number of admissions, while the second one is relative to the number of patients afflicted by the condition indicated by the first column of the row.

| <b>Unit</b>                                 | <b>No. of admissions</b> | <b>%</b> |
|---------------------------------------------|--------------------------|----------|
| Coronary Care Unit (CCU)                    | 7681                     | 14.2     |
| Cardiac Surgery Recovery Unit (CSRU)        | 9257                     | 17.1     |
| Medical Intensive Care Unit (MICU)          | 20926                    | 38.8     |
| Surgical Intensive Care Unit (SICU)         | 8841                     | 16.4     |
| Trauma Surgical Intensive Care Unit (TSICU) | 6414                     | 11.9     |
| Unspecified                                 | 875                      | 1.62     |

Supplementary Table 2: Number of admissions to each intensive care unit

| <b>Feature name</b>             | <b>Unit of measurement</b> | <b>Minimum</b> | <b>Maximum</b> |
|---------------------------------|----------------------------|----------------|----------------|
| Age                             | -                          | 15             | 90             |
| Arterial pH                     | -                          | 1              | 10             |
| Diastolic Blood Pressure        | mmHg                       | 1              | 300            |
| Fraction of Inspired Oxygen     | %                          | 5              | 100            |
| Glasgow Coma Scale              | points                     | 0              | 15             |
| Heart Rate                      | bpm                        | 1              | 320            |
| Mean Arterial Blood Pressure    | mmHg                       | 1              | 400            |
| Platelet Count                  | K/ $\mu$ L                 | 1              | 1500           |
| Respiratory Rate                | bpm                        | 1              | 150            |
| Riker Sedation-Agitation Scale  | -                          | 0              | 7              |
| Systolic Blood Pressure         | mmHg                       | 1              | 400            |
| Oxygen Saturation               | %                          | 1              | 100            |
| Bicarbonate Level               | mEq/L                      | 1              | 50             |
| Blood Urea Nitrogen             | mg/dL                      | 1              | 300            |
| Creatinine                      | mg/dL                      | 1              | 20             |
| Hematocrit                      | %                          | 1              | 100            |
| Hemoglobin                      | g/dL                       | 1              | 50             |
| Potassium                       | mEq/L                      | 0              | 20             |
| Partial Carbon Dioxide Pressure | mmHg                       | 1              | 70             |
| Partial Oxygen Pressure         | mmHg                       | 1              | 200            |
| White Blood Cell Count          | K/ $\mu$ L                 | 0.1            | 100            |
| Fluid Input                     | mL                         | 0              | 50,000         |
| Antibiotics                     | -                          | -              | -              |
| Urine Output                    | mL                         | 0              | 10,000         |

Supplementary Table 3: Ranges used for outlier detection
